# Supplementary material
Source: PubMed Central journal article supplement (PMC7543354)
Supplement: ONCO-25-859-s001.pdf [file ONCO-25-859-s001.pdf]

Supplemental Tables for:  
Sustained CA19-9 response to neoadjuvant chemotherapy in borderline resectable pancreatic cancer predicts progression and survival

J. Bart Rose et al.

**Table S1:** ROC curve criterion

| Percent change in CA19-9 from baseline to minimum value |             |             |             |              |       |      | Percent change in CA19-9 from minimum to final value |             |              |             |             |     |     |
|---------------------------------------------------------|-------------|-------------|-------------|--------------|-------|------|------------------------------------------------------|-------------|--------------|-------------|-------------|-----|-----|
| Criterion                                               | Sensitivity | 95% CI      | Specificity | 95% CI       | +LR   | -LR  | Criterion                                            | Sensitivity | 95% CI       | Specificity | 95% CI      | +LR | -LR |
| <0                                                      | 0           | 0.0 - 9.0   | 100         | 94.5 - 100.0 |       | 1    | ≥0                                                   | 100         | 91.0 - 100.0 | 0           | 0.0 - 5.5   | 1   |     |
| ≤40                                                     | 17.95       | 7.5 - 33.5  | 98.46       | 91.7 - 100.0 | 11.67 | 0.83 | >5                                                   | 97.44       | 86.5 - 99.9  | 24.62       | 14.8 - 36.9 | 1.3 | 0.1 |
| ≤44                                                     | 23.08       | 11.1 - 39.3 | 96.92       | 89.3 - 99.6  | 7.5   | 0.79 | >14                                                  | 92.31       | 79.1 - 98.4  | 26.15       | 16.0 - 38.5 | 1.3 | 0.3 |
| ≤45                                                     | 25.64       | 13.0 - 42.1 | 95.38       | 87.1 - 99.0  | 5.56  | 0.78 | >20                                                  | 89.74       | 75.8 - 97.1  | 29.23       | 18.6 - 41.8 | 1.3 | 0.4 |
| ≤58                                                     | 35.9        | 21.2 - 52.8 | 93.85       | 85.0 - 98.3  | 5.83  | 0.68 | >22                                                  | 87.18       | 72.6 - 95.7  | 33.85       | 22.6 - 46.6 | 1.3 | 0.4 |
| ≤64                                                     | 38.46       | 23.4 - 55.4 | 90.77       | 81.0 - 96.5  | 4.17  | 0.68 | >27                                                  | 84.62       | 69.5 - 94.1  | 40          | 28.0 - 52.9 | 1.4 | 0.4 |
| ≤67                                                     | 41.03       | 25.6 - 57.9 | 89.23       | 79.1 - 95.6  | 3.81  | 0.66 | >28                                                  | 82.05       | 66.5 - 92.5  | 41.54       | 29.4 - 54.4 | 1.4 | 0.4 |
| ≤73                                                     | 51.28       | 34.8 - 67.6 | 87.69       | 77.2 - 94.5  | 4.17  | 0.56 | >33                                                  | 79.49       | 63.5 - 90.7  | 50.77       | 38.1 - 63.4 | 1.6 | 0.4 |
| ≤77                                                     | 53.85       | 37.2 - 69.9 | 84.62       | 73.5 - 92.4  | 3.5   | 0.55 | >36                                                  | 74.36       | 57.9 - 87.0  | 52.31       | 39.5 - 64.9 | 1.6 | 0.5 |
| ≤78*                                                    | 58.97       | 42.1 - 74.4 | 83.08       | 71.7 - 91.2  | 3.48  | 0.49 | >37                                                  | 71.79       | 55.1 - 85.0  | 53.85       | 41.0 - 66.3 | 1.6 | 0.5 |
| ≤84                                                     | 61.54       | 44.6 - 76.6 | 73.85       | 61.5 - 84.0  | 2.35  | 0.52 | >39                                                  | 69.23       | 52.4 - 83.0  | 55.38       | 42.5 - 67.7 | 1.6 | 0.6 |
| ≤87                                                     | 66.67       | 49.8 - 80.  | 66.15       | 53.4 - 77.   | 1.97  | 0.5  | >47                                                  | 66.67       | 49.8 - 80.   | 64.62       | 51.8 - 76.  | 1.9 | 0.5 |

|      |       |                        |       |                       |          |          |  |       |       |                       |       |                        |         |         |
|------|-------|------------------------|-------|-----------------------|----------|----------|--|-------|-------|-----------------------|-------|------------------------|---------|---------|
|      |       | 9                      |       | 4                     |          |          |  |       | 9     |                       | 1     |                        |         |         |
| ≤89  | 71.79 | 55.1<br>-<br>85.<br>0  | 63.08 | 50.2<br>-<br>74.<br>7 | 1.9<br>4 | 0.<br>45 |  | >53   | 56.41 | 39.6<br>-<br>72.<br>2 | 66.15 | 53.4<br>-<br>77.<br>4  | 1.<br>7 | 0.<br>7 |
| ≤91  | 76.92 | 60.7<br>-<br>88.<br>9  | 61.54 | 48.6<br>-<br>73.<br>3 | 2        | 0.<br>37 |  | >58   | 53.85 | 37.2<br>-<br>69.<br>9 | 70.77 | 58.2<br>-<br>81.<br>4  | 1.<br>8 | 0.<br>7 |
| ≤93  | 82.05 | 66.5<br>-<br>92.<br>5  | 50.77 | 38.1<br>-<br>63.<br>4 | 1.6<br>7 | 0.<br>35 |  | >63   | 51.28 | 34.8<br>-<br>67.<br>6 | 78.46 | 66.5<br>-<br>87.<br>7  | 2.<br>4 | 0.<br>6 |
| ≤94  | 84.62 | 69.5<br>-<br>94.<br>1  | 41.54 | 29.4<br>-<br>54.<br>4 | 1.4<br>5 | 0.<br>37 |  | >66 * | 48.72 | 32.4<br>-<br>65.<br>2 | 83.08 | 71.7<br>-<br>91.<br>2  | 2.<br>9 | 0.<br>6 |
| ≤95  | 87.18 | 72.6<br>-<br>95.<br>7  | 40    | 28.0<br>-<br>52.<br>9 | 1.4<br>5 | 0.<br>32 |  | >72   | 35.9  | 21.2<br>-<br>52.<br>8 | 84.62 | 73.5<br>-<br>92.<br>4  | 2.<br>3 | 0.<br>8 |
| ≤96  | 92.31 | 79.1<br>-<br>98.<br>4  | 35.38 | 23.9<br>-<br>48.<br>2 | 1.4<br>3 | 0.<br>22 |  | >73   | 33.33 | 19.1<br>-<br>50.<br>2 | 86.15 | 75.3<br>-<br>93.<br>5  | 2.<br>4 | 0.<br>8 |
| ≤98  | 94.87 | 82.7<br>-<br>99.<br>4  | 20    | 11.1<br>-<br>31.<br>8 | 1.1<br>9 | 0.<br>26 |  | >77   | 30.77 | 17.0<br>-<br>47.<br>6 | 89.23 | 79.1<br>-<br>95.<br>6  | 2.<br>9 | 0.<br>8 |
| ≤99  | 97.44 | 86.5<br>-<br>99.<br>9  | 3.08  | 0.4 -<br>10.<br>7     | 1.0<br>1 | 0.<br>83 |  | >84   | 17.95 | 7.5 -<br>33.<br>5     | 90.77 | 81.0<br>-<br>96.<br>5  | 1.<br>9 | 0.<br>9 |
| ≤100 | 100   | 91.0<br>-<br>100<br>.0 | 0     | 0.0 -<br>5.5          | 1        |          |  | >92   | 5.13  | 0.6 -<br>17.<br>3     | 93.85 | 85.0<br>-<br>98.<br>3  | 0.<br>8 | 1       |
|      |       |                        |       |                       |          |          |  | >99   | 0     | 0.0 -<br>9.0          | 100   | 94.5<br>-<br>100<br>.0 |         | 1       |

\* Youden index J

**Table S2:** Type of adjuvant therapy by response group

| CA19-9 Response Group | CRT     | FOLFIRI | FOLFIRINOX | FOLFOX | GemDoc  | GemAbx | IROX    | VM      | Capecitabine | Observation |
|-----------------------|---------|---------|------------|--------|---------|--------|---------|---------|--------------|-------------|
| 1                     | 0       | 1       | 0          | 1      | 0       | 0      | 0       | 0       | 1            | 1           |
| 2                     | 2       | 3       | 1          | 0      | 2       | 0      | 1       | 1       | 0            | 0           |
| 3                     | 0       | 2       | 0          | 1      | 0       | 1      | 0       | 4       | 0            | 1           |
| 4                     | 9       | 2       | 4          | 0      | 3       | 0      | 1       | 13      | 0            | 10          |
|                       |         |         |            |        |         |        |         |         |              |             |
| Total                 | 11      | 8       | 5          | 2      | 5       | 1      | 2       | 18      | 1            | 12          |
|                       |         |         |            |        |         |        |         |         |              |             |
| Treatment timeframe   | 2011-17 | 2013-16 | 2011-16    | 2011   | 2011-17 | 2016   | 2012-13 | 2010-16 | 2010         | 2011-17     |

CRT = XRT, Fluoropyrimidine (5FU or capecitabine)

FOLFIRI = 5-fluorouracil, Leucovorin, Irinotecan

FOLFIRINOX = 5-fluorouracil, Leucovorin, Irinotecan, Oxaliplatin

FOLFOX = 5-fluorouracil, Leucovorin, Oxaliplatin

GD = Gemcitabine, Docetaxel

GA = Gemcitabine, Abraxane

IROX = Irinotecan, Oxaliplatin

VM = XRT, Interferon, cisplatin, 5-fluorouracil
